# Supplementary material for: To share or not? When sharing environmental and social responsibility meets power imbalance
Source: Research Square preprint supplement (doi:10.21203/rs.3.rs-8029913/v1), 2025-12-01
Supplement: Supplementary file 1 [file 3ddcf7456e84bf259db20d4c.docx]

**Appendix A.**

**Proof for equilibriums in Table 4**

We provide the mathematical steps in MS model as follow. .so is concave in , From , we get .Substituting into , we get and <0, so is concave in .Let , we get .Replace to , we get , we substitute and into , , ,and . The equilibriums are shown in Table 4. We provide the mathematical steps in MN model as follows. , so is concave in , From , we get .Substituting into , we get and , so is concave in .Let , we get .Replace to , we get , we substitute and into , , ,and . The equilibriums are shown in Table 4.

**Proof for equilibriums in Table 6**

We provide the mathematical steps in RS model as follow. Substituting into and , , so is concave in , From , we get . Substituting into , we get and , so is concave in . Let , we get . Replace to ,we get , Replace and to , we get we substitute and into ,,,and. The equilibriums are shown in Table 6. We provide the mathematical steps in RN model as follow. Substituting into and , , so is concave in , From , we get . Substituting into ,we get and , so is concave in . Let , we get . Replace to ,we get , Replace and to , we get we substitute and into , , ,and . The equilibriums are shown in Table 6.

**Appendix B**

**Proof of Corollary 1**

, because of and , when, then ; when , then .

, because of and , when , then ; when , then . , because of and , when , then ; when , then . , then ., because of and , when , then ; when , then . , because of , and , when , then ; when , then .

**Proof of Corollary 2**

, because of and , when, then ; when , then. , because of and , when , then ; when , then . , then , because of and , when , then ; when , then ., because of and , when , then ; when , then . , because of , and , when , then ; when , then .

**Appendix C**

**Proof of Proposition 1**

, then . , If, when , then ; when , then . If, when , then ; when , then .

**Proof of Proposition 2**

, because of and , then ;, because of and , then .

**Proof of Proposition 3**

, because of and , if , when , then ; when , then ; if , when , then ; when , then .

**Proof of Proposition 4**

, because of and , if , when , then ; when , then . if, when , then ; when , then .

**Proof of Proposition 5**

, because of and , when , then ; when , then . , because of and , when , then ; when , .

**Proof of Proposition 6**

, because of and , when , then ; when then . , because of and when , then ; when , then .

**Proof of Proposition 7**

, because of and when , ; when , .

**Proof of Proposition 8**

, because of and , when , then ; when and , then .

**Proof of Proposition 9**

, because of and , if, when , then ; when , then . If, when ,; when , then . , because of and when , then ; when , .

**Proof of Proposition 10**

, because of and , when , then ; when then . , because of and , when , then ; when , then .

**Proof of Proposition 11**

, because of and when , ; when , .

**Proof of Proposition 12**

, because of and , when ,; when , .
